# Supplementary material for: Dystroglycan is a scaffold for extracellular axon guidance decisions
Source: eLife journal article supplement (doi:10.7554/elife.42143), 2019-02-13
Supplement: supp [file elife-42143-supp-v1.zip]

Archive with 8 entries (8 files):
- elife_poa_e42143_Figure_1_figure_supplement_1.ai
- elife_poa_e42143_Figure_2_figure_supplement_1.ai
- elife_poa_e42143_Figure_6_figure_supplement_1.ai
- elife_poa_e42143_Figure_3_figure_supplement_2.ai
- elife_poa_e42143_Supplementary_File_2.docx
- elife_poa_e42143_Transparent_Reporting_File.pdf
- elife_poa_e42143_Figure_3_figure_supplement_1.ai
- elife_poa_e42143_Supplementary_File_1.docx
