# Supplementary material for: Dystroglycan is a scaffold for extracellular axon guidance decisions
Source: eLife journal article supplement (doi:10.7554/elife.42143), 2019-02-13
Supplement: supp [file elife-42143-supp-v1.zip › elife_poa_e42143_Supplementary_File_1.docx]

**Table 1: Open book raw data for *Dag1* mutants**

| Genotype | Embryo # | Injection sites | Normal turn | AP randomization | % normal | Genotype average ±SEM |
| --- | --- | --- | --- | --- | --- | --- |
| Control | 1 | 6 | 6 | 0 | 100 |  |
|  | 2 | 11 | 11 | 0 | 100 |  |
|  | 3 | 13 | 13 | 0 | 100 |  |
|  | 4 | 9 | 9 | 0 | 100 |  |
|  | 5 | 3 | 3 | 0 | 100 |  |
|  | 6 | 7 | 6 | 1 | 85.71 | 97.62 ±3.39 |
|  |  |  |  |  |  |  |
| Dag1Flox/- ; Sox2Cre | 1 | 3 | 0 | 3 | 0 |  |
|  | 2 | 3 | 0 | 3 | 0 |  |
|  | 3 | 11 | 1 | 10 | 9.09 | 3.03 ±4.80 |
|  |  |  |  |  |  |  |
| Dag1Bcyto/- | 1 | 9 | 9 | 0 | 100 |  |
|  | 2 | 13 | 10 | 3 | 76.92 |  |
|  | 3 | 12 | 11 | 1 | 91.67 | 89.52 ±4.8 |
|  |  |  |  |  |  |  |
| Dag1Flox/- ; Wnt1Cre | 1 | 4 | 4 | 0 | 100 |  |
|  | 2 | 8 | 6 | 2 | 75 |  |
|  | 3 | 11 | 11 | 0 | 100 |  |
|  | 4 | 8 | 7 | 1 | 87.5 |  |
|  | 5 | 9 | 9 | 0 | 100 |  |
|  | 6 | 4 | 4 | 0 | 100 |  |
|  | 7 | 8 | 8 | 0 | 100 |  |
|  | 8 | 7 | 7 | 0 | 100 | 95.31 ±2.94 |
