# Supplementary material for: Dystroglycan is a scaffold for extracellular axon guidance decisions
Source: eLife journal article supplement (doi:10.7554/elife.42143), 2019-02-13
Supplement: supp [file elife-42143-supp-v1.zip › elife_poa_e42143_Supplementary_File_2.docx]

| Genotype | Embryo # | Injection sites | Normal turn | AP randomization | % normal | Genotype average ±SEM |
| --- | --- | --- | --- | --- | --- | --- |
| *Celsr3R1548Q/+* | 1 | 7 | 6 | 1 | 85.7 |  |
|  | 2 | 10 | 8 | 2 | 80 |  |
|  | 3 | 6 | 5 | 1 | 83.33 |  |
|  | 4 | 10 | 9 | 1 | 90 |  |
|  | 5 | 6 | 5 | 1 | 83.33 |  |
|  | 6 | 6 | 5 | 1 | 83.33 |  |
|  | 7 | 4 | 4 | 0 | 100 | 86.5 ±2.52 |
|  |  |  |  |  |  |  |
| *Celsr3R1548Q/R1548Q* | 1 | 9 | 2 | 7 | 28.6 |  |
|  | 2 | 10 | 2 | 8 | 25 |  |
|  | 3 | 8 | 3 | 5 | 37.5 |  |
|  | 4 | 7 | 0 | 7 | 0 |  |
|  | 5 | 7 | 3 | 4 | 42.86 |  |
|  | 6 | 7 | 0 | 7 | 0 | 22.32 ±6.35 |

**Table 2: Open book raw data for Celsr3R1548Q/R1548Q mutants**
